# Supplementary material for: Mapping the Genomic Regions Controlling Germination Rate and Early Seedling Growth Parameters in Rice
Source: MDPI journal article supplement (doi:10.3390/genes14040902), 2023-04-12
Supplement: s1 [file s1]

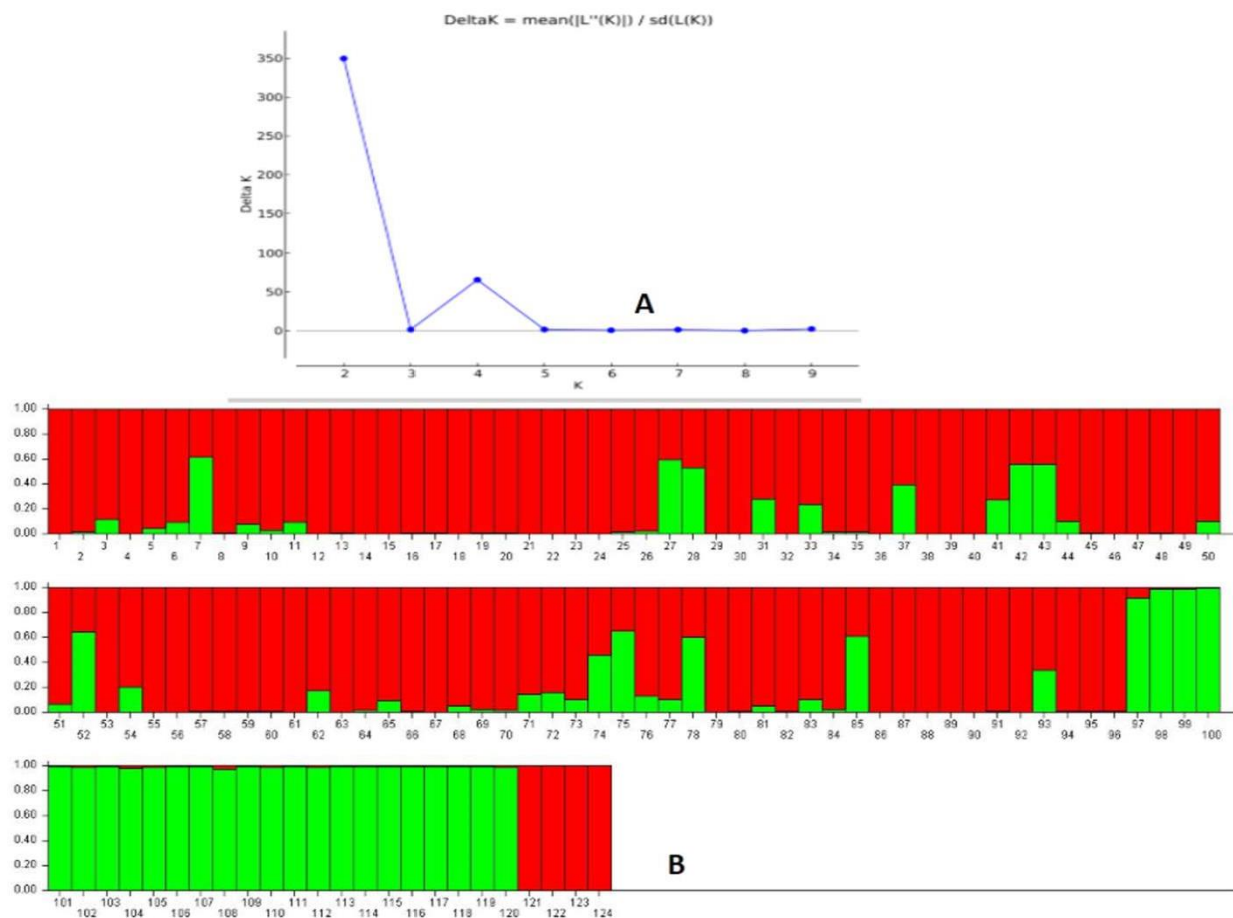

**Supplementary Figure S1. (A)** Graph of  $\Delta K$  value, to the rate of change in the log probability of data between successive K values; **(B)** Population structure of the 108 panel population based on membership probability fractions of individual genotypes at K=2. The genotypes with the probability of  $\geq 80\%$  membership proportions were assigned as subgroups while others grouped as admixture group. The numbers in the diagram depict the serial number of the germplasm lines listed in Table 1.

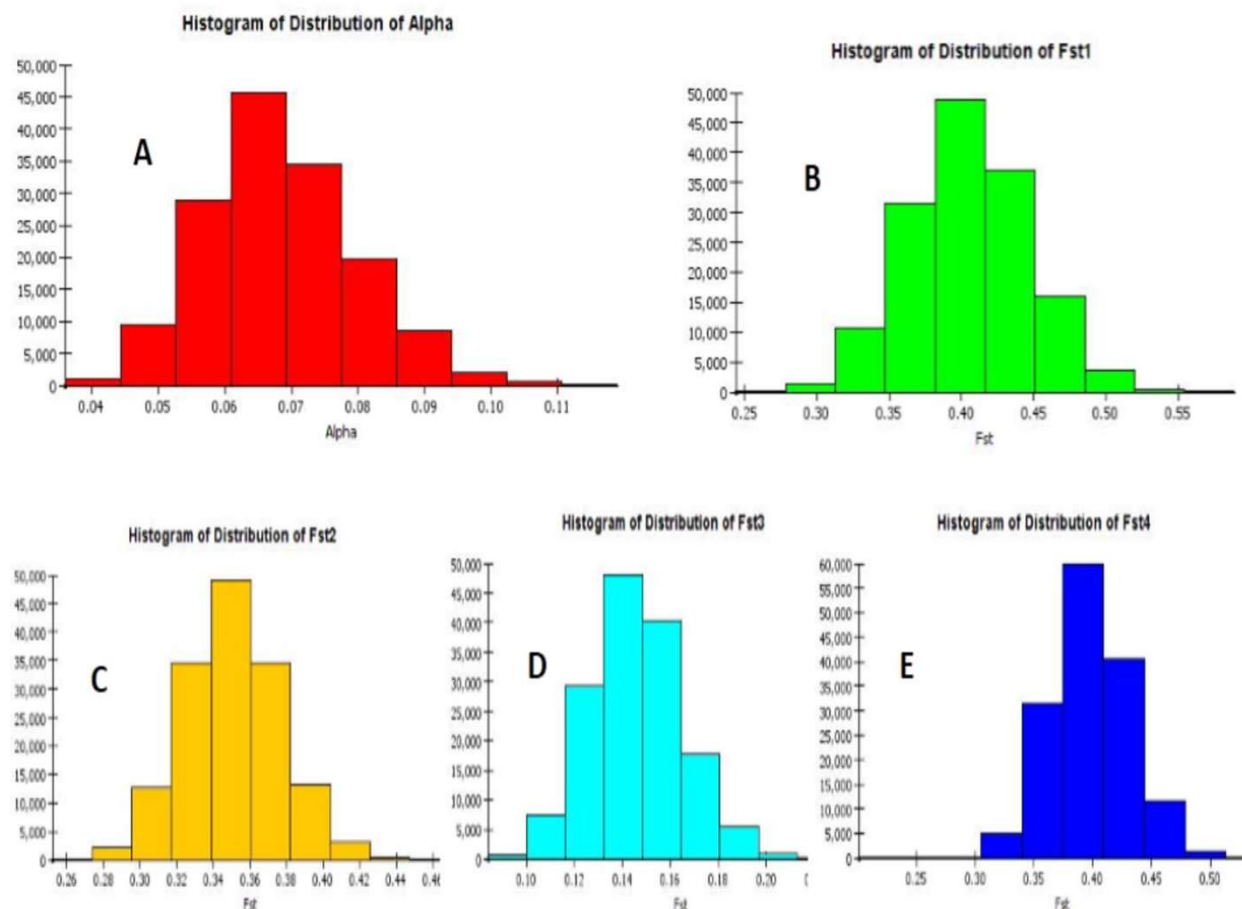

**Supplementary Figure S2.** The distribution pattern of alpha and  $F_{ST}$  values (A) Alpha value of the population at  $K = 4$  and (B–E) four subpopulations at  $K = 4$  showing a symmetric shape of the four  $F_{ST}$  values.

**Supplementary Table 1.** Mean estimates of germination rate and early seedling growth parameters estimated from 278 rice germplasm lines.

| Sl. No. | Name of the germplasm | RSG   | RGR   | AGR   | MGR   |
|---------|-----------------------|-------|-------|-------|-------|
| 1       | *Magura-s             | 1.380 | 0.241 | 1.857 | 0.181 |
| 2       | Maguramanji           | 1.173 | 0.058 | 1.657 | 0.228 |
| 3       | Kalakanhu             | 1.245 | 0.062 | 0.785 | 0.232 |
| 4       | *Magra                | 0.846 | 0.175 | 2.065 | 0.204 |
| 5       | Jata                  | 0.785 | 0.154 | 0.845 | 0.325 |
| 6       | *Kathidhan            | 0.436 | 0.091 | 0.871 | 0.189 |
| 7       | Gargarh               | 0.982 | 0.113 | 1.121 | 0.156 |
| 8       | Jhuli                 | 1.112 | 0.089 | 0.725 | 0.245 |
| 9       | *Karpurkanti          | 0.694 | 0.073 | 1.004 | 0.211 |
| 10      | Rasuna                | 0.845 | 0.112 | 0.645 | 0.169 |

|    |                         |       |       |       |       |
|----|-------------------------|-------|-------|-------|-------|
| 11 | *Lalgundi               | 0.584 | 0.137 | 0.841 | 0.219 |
| 12 | Latasal                 | 0.781 | 0.071 | 1.105 | 0.258 |
| 13 | Kasibaha                | 0.689 | 0.074 | 0.746 | 0.172 |
| 14 | *Latamahu               | 0.317 | 0.212 | 1.149 | 0.194 |
| 15 | Rangi                   | 0.941 | 0.087 | 0.658 | 0.241 |
| 16 | Kalakadam               | 0.853 | 0.078 | 0.696 | 0.186 |
| 17 | *Kantakaamala           | 0.410 | 0.085 | 1.114 | 0.213 |
| 18 | Pankhi                  | 0.912 | 0.112 | 0.721 | 0.211 |
| 19 | *Kanakchampa            | 0.448 | 0.301 | 1.107 | 0.182 |
| 20 | Sodi                    | 0.877 | 0.089 | 0.845 | 0.193 |
| 21 | *Kundadhan              | 0.764 | 0.238 | 0.928 | 0.165 |
| 22 | Bhundi                  | 0.763 | 0.187 | 0.984 | 0.218 |
| 23 | *Landi                  | 0.614 | 0.151 | 1.224 | 0.207 |
| 24 | Daonra                  | 0.985 | 0.115 | 1.112 | 0.214 |
| 25 | *kapanthi               | 1.463 | 0.071 | 2.170 | 0.219 |
| 26 | Pasibutia               | 0.883 | 0.143 | 1.018 | 0.211 |
| 27 | *LatAc.haunri           | 0.246 | 0.196 | 0.658 | 0.218 |
| 28 | Salkoiya                | 0.785 | 0.158 | 1.142 | 0.208 |
| 29 | *Laxmibilash            | 0.382 | 0.261 | 0.650 | 0.196 |
| 30 | Guntha                  | 0.825 | 0.146 | 1.136 | 0.235 |
| 31 | Malata                  | 0.863 | 0.089 | 0.987 | 0.189 |
| 32 | *Kantakapura            | 0.975 | 0.116 | 1.385 | 0.231 |
| 33 | *Chinamal               | 0.528 | 0.186 | 1.015 | 0.208 |
| 34 | Pindagadi               | 0.998 | 0.097 | 0.728 | 0.169 |
| 35 | Baunsagaja              | 0.946 | 0.102 | 0.984 | 0.173 |
| 36 | *GondiAc.hampeisiali    | 0.870 | 0.089 | 1.325 | 0.217 |
| 37 | Palasphul               | 0.754 | 0.113 | 0.993 | 0.208 |
| 38 | *BalisaralaktimAc.hi -k | 0.968 | 0.136 | 2.080 | 0.231 |
| 39 | Matia                   | 0.789 | 0.109 | 1.112 | 0.211 |
| 40 | Sarada                  | 0.863 | 0.124 | 1.108 | 0.162 |
| 41 | *Champaeisiali          | 0.936 | 0.110 | 2.058 | 0.231 |
| 42 | Ladu                    | 0.987 | 0.162 | 1.119 | 0.185 |
| 43 | *Kaniar                 | 0.843 | 0.051 | 1.250 | 0.225 |
| 44 | Madhabi                 | 0.962 | 0.175 | 0.987 | 0.167 |
| 45 | AC.9011                 | 1.279 | 0.116 | 2.100 | 0.268 |
| 46 | *AC.9050                | 0.254 | 0.148 | 0.469 | 0.258 |
| 47 | AC.9102                 | 0.647 | 0.294 | 1.383 | 0.231 |
| 48 | AC.9119A                | 0.310 | 0.227 | 0.653 | 0.214 |
| 49 | *AC.9093                | 0.564 | 0.162 | 0.996 | 0.302 |
| 50 | AC.9008                 | 0.658 | 0.112 | 0.854 | 0.245 |
| 51 | AC.9010                 | 0.525 | 0.215 | 0.754 | 0.213 |

|    |           |       |       |       |       |
|----|-----------|-------|-------|-------|-------|
| 52 | *AC.9043  | 1.286 | 0.023 | 1.536 | 0.313 |
| 53 | AC.9016   | 0.463 | 0.186 | 0.689 | 0.308 |
| 54 | AC.9019   | 0.786 | 0.245 | 1.154 | 0.256 |
| 55 | *AC.9044A | 0.986 | 0.268 | 2.285 | 0.280 |
| 56 | AC.9022   | 0.742 | 0.224 | 0.894 | 0.287 |
| 57 | AC.9023   | 0.683 | 0.124 | 0.879 | 0.243 |
| 58 | AC.9025   | 0.712 | 0.185 | 0.785 | 0.215 |
| 59 | *AC.9005  | 1.121 | 0.098 | 1.875 | 0.302 |
| 60 | AC.9059   | 0.652 | 0.162 | 0.776 | 0.325 |
| 61 | *AC.9076A | 0.139 | 0.199 | 0.681 | 0.258 |
| 62 | AC.9063   | 0.732 | 0.223 | 0.721 | 0.346 |
| 63 | AC.9076   | 0.652 | 0.174 | 0.658 | 0.328 |
| 64 | *AC.9030  | 1.665 | 0.243 | 2.285 | 0.272 |
| 65 | AC.9081   | 0.559 | 0.165 | 0.842 | 0.214 |
| 66 | *AC.9058  | 1.126 | 0.123 | 1.428 | 0.278 |
| 67 | AC.9086   | 0.694 | 0.189 | 0.814 | 0.258 |
| 68 | AC.9095   | 0.712 | 0.214 | 0.786 | 0.223 |
| 69 | *AC.9028  | 1.365 | 0.119 | 2.302 | 0.311 |
| 70 | AC.9097   | 0.652 | 0.225 | 0.774 | 0.215 |
| 71 | *AC.9065  | 0.869 | 0.128 | 1.196 | 0.325 |
| 72 | AC.9099   | 0.559 | 0.189 | 0.658 | 0.219 |
| 73 | AC.9118   | 0.638 | 0.178 | 0.846 | 0.223 |
| 74 | *AC.9063  | 1.121 | 0.131 | 1.597 | 0.286 |
| 75 | AC.9155   | 0.611 | 0.162 | 0.723 | 0.224 |
| 76 | AC.9157   | 0.584 | 0.149 | 0.645 | 0.221 |
| 77 | AC.9232   | 1.121 | 0.115 | 1.124 | 0.251 |
| 78 | *AC.9006  | 1.189 | 0.123 | 1.896 | 0.292 |
| 79 | AC.9241   | 1.541 | 0.164 | 1.152 | 0.241 |
| 80 | *AC.9053A | 0.857 | 0.013 | 0.997 | 0.235 |
| 81 | AC.9248   | 1.329 | 0.148 | 1.128 | 0.218 |
| 82 | AC.9268   | 1.116 | 0.148 | 0.887 | 0.278 |
| 83 | *AC.9021  | 1.113 | 0.151 | 1.412 | 0.282 |
| 84 | AC.9273   | 0.897 | 0.164 | 0.985 | 0.235 |
| 85 | *AC.9038  | 1.638 | 0.281 | 2.543 | 0.281 |
| 86 | AC.9278   | 0.984 | 0.158 | 0.846 | 0.264 |
| 87 | AC.9077   | 0.998 | 0.089 | 1.114 | 0.283 |
| 88 | AC.9094   | 1.165 | 0.092 | 1.105 | 0.234 |
| 89 | AC.9096   | 1.143 | 0.098 | 0.785 | 0.225 |
| 90 | *AC.9035  | 1.754 | 0.118 | 2.657 | 0.295 |
| 91 | AC.9122   | 1.542 | 0.141 | 0.798 | 0.215 |
| 92 | *AC.9090  | 0.812 | 0.165 | 1.254 | 0.292 |

|     |                   |       |       |       |       |
|-----|-------------------|-------|-------|-------|-------|
| 93  | AC.9127           | 1.878 | 0.164 | 0.845 | 0.222 |
| 94  | *Pk-21            | 1.597 | 0.061 | 2.387 | 0.235 |
| 95  | *Mahamaga         | 0.621 | 0.105 | 1.113 | 0.223 |
| 96  | Umamata           | 0.930 | 0.180 | 1.470 | 0.207 |
| 97  | * D1              | 0.488 | 0.245 | 0.863 | 0.203 |
| 98  | Uma               | 0.359 | 0.105 | 0.658 | 0.157 |
| 99  | M-10              | 0.451 | 0.115 | 0.645 | 0.213 |
| 100 | *Ezhoml-2         | 0.668 | 0.261 | 0.942 | 0.225 |
| 101 | Nambial Amber     | 0.325 | 0.165 | 0.556 | 0.195 |
| 102 | Aiswarya          | 0.463 | 0.215 | 0.821 | 0.214 |
| 103 | *Kozhivalan       | 0.532 | 0.216 | 0.630 | 0.228 |
| 104 | Kanchan           | 0.514 | 0.189 | 0.658 | 0.152 |
| 105 | *Cheruvirippu     | 0.516 | 0.089 | 0.808 | 0.231 |
| 106 | KunjeKunje        | 0.328 | 0.225 | 0.725 | 0.116 |
| 107 | Harsha            | 0.412 | 0.185 | 0.625 | 0.227 |
| 108 | *Adira-3 Pallakad | 0.846 | 0.112 | 1.345 | 0.232 |
| 109 | Kanjana           | 0.369 | 0.235 | 0.821 | 0.185 |
| 110 | Adhuthurai        | 0.358 | 0.242 | 0.632 | 0.226 |
| 111 | *Gandhakasala     | 0.690 | 0.102 | 1.412 | 0.231 |
| 112 | Ambeponar         | 0.459 | 0.165 | 0.725 | 0.163 |
| 113 | * Sreyas          | 0.711 | 0.071 | 1.358 | 0.225 |
| 114 | *Jaya             | 0.511 | 0.279 | 1.011 | 0.228 |
| 115 | Triveni           | 0.389 | 0.342 | 1.235 | 0.224 |
| 116 | *PK6              | 0.635 | 0.165 | 1.079 | 0.211 |
| 117 | Chengarama        | 0.412 | 0.258 | 1.212 | 0.221 |
| 118 | *Adira-1 Pallakad | 0.891 | 0.071 | 1.121 | 0.236 |
| 119 | *Jyothi           | 0.732 | 0.256 | 1.146 | 0.211 |
| 120 | Kuttosam          | 0.383 | 0.126 | 0.825 | 0.156 |
| 121 | *CR4034-77-5      | 0.692 | 0.173 | 0.825 | 0.189 |
| 122 | *CR4034-77-2      | 0.725 | 0.181 | 0.912 | 0.178 |
| 123 | *Jalamagna        | 0.930 | 0.114 | 2.320 | 0.220 |
| 124 | *Panidhan         | 0.900 | 0.081 | 1.390 | 0.201 |
| 125 | Thavalakkaman     | 0.396 | 0.154 | 0.875 | 0.163 |
| 126 | *Marathondi       | 1.075 | 0.061 | 1.329 | 0.231 |
| 127 | Champanmata       | 0.423 | 0.187 | 0.965 | 0.187 |
| 128 | Kalladiyaran      | 0.408 | 0.196 | 0.745 | 0.176 |
| 129 | *Adira-2 Pallakad | 0.851 | 0.073 | 1.632 | 0.238 |
| 130 | Onam              | 0.374 | 0.214 | 0.758 | 0.189 |
| 131 | *VAc.haw          | 0.242 | 0.115 | 0.633 | 0.236 |
| 132 | Nooravella        | 0.368 | 0.211 | 0.942 | 0.195 |
| 133 | Airweraga         | 0.586 | 0.133 | 0.836 | 0.221 |

|     |               |       |       |       |       |
|-----|---------------|-------|-------|-------|-------|
| 134 | Chetadi       | 0.411 | 0.217 | 0.932 | 0.184 |
| 135 | Amballavalaya | 0.453 | 0.231 | 0.914 | 0.211 |
| 136 | AC.20117      | 0.584 | 0.112 | 0.847 | 0.232 |
| 137 | *AC.20770     | 1.209 | 0.052 | 1.512 | 0.248 |
| 138 | AC.20436      | 1.090 | 0.170 | 2.063 | 0.231 |
| 139 | *AC.20423     | 0.612 | 0.149 | 1.712 | 0.218 |
| 140 | AC.20604      | 0.940 | 0.141 | 1.937 | 0.244 |
| 141 | *AC.20614     | 0.199 | 0.153 | 0.519 | 0.241 |
| 142 | *AC.20686     | 0.208 | 0.162 | 0.374 | 0.256 |
| 143 | AC.20690      | 0.643 | 0.107 | 0.890 | 0.248 |
| 144 | *AC.20845     | 1.081 | 0.112 | 1.349 | 0.231 |
| 145 | *AC.20627     | 0.705 | 0.014 | 0.928 | 0.248 |
| 146 | AC.20071      | 0.687 | 0.185 | 0.857 | 0.214 |
| 147 | *AC.20664     | 0.293 | 0.084 | 0.519 | 0.236 |
| 148 | *AC.20907     | 0.528 | 0.069 | 0.812 | 0.228 |
| 149 | AC.20081      | 0.745 | 0.151 | 0.754 | 0.205 |
| 150 | *AC.20246     | 0.876 | 0.145 | 1.278 | 0.271 |
| 151 | AC.20095      | 0.732 | 0.164 | 0.658 | 0.218 |
| 152 | AC.20113      | 0.685 | 0.089 | 0.712 | 0.234 |
| 153 | *AC.20282     | 1.192 | 0.105 | 2.019 | 0.258 |
| 154 | *AC.20328     | 1.085 | 0.105 | 1.589 | 0.287 |
| 155 | AC.20119      | 0.657 | 0.104 | 1.125 | 0.189 |
| 156 | *AC.20371     | 1.153 | 0.107 | 1.487 | 0.301 |
| 157 | AC.20121      | 0.711 | 0.164 | 1.321 | 0.192 |
| 158 | *AC.20347     | 0.687 | 0.150 | 1.248 | 0.218 |
| 159 | AC.20128      | 0.987 | 0.152 | 0.845 | 0.211 |
| 160 | *AC.20362     | 0.782 | 0.100 | 1.179 | 0.293 |
| 161 | *AC.20389     | 0.711 | 0.112 | 1.114 | 0.275 |
| 162 | AC.20136      | 0.841 | 0.147 | 0.741 | 0.208 |
| 163 | *AC.20317     | 0.172 | 0.148 | 0.452 | 0.291 |
| 164 | *AC.20920     | 0.935 | 0.043 | 2.081 | 0.223 |
| 165 | AC.20137      | 0.743 | 0.138 | 0.785 | 0.217 |
| 166 | AC.5946       | 0.520 | 0.168 | 0.845 | 0.165 |
| 167 | *AC.10187     | 0.672 | 0.159 | 2.587 | 0.210 |
| 168 | AC.6006       | 0.570 | 0.130 | 1.393 | 0.187 |
| 169 | *AC.6023      | 0.958 | 0.128 | 2.145 | 0.197 |
| 170 | AC.6617       | 0.940 | 0.362 | 1.573 | 0.182 |
| 171 | *AC.7008      | 0.725 | 0.196 | 1.423 | 0.186 |
| 172 | AC.7009       | 0.530 | 0.088 | 1.093 | 0.187 |
| 173 | AC.7124       | 0.373 | 0.153 | 0.663 | 0.182 |
| 174 | AC.7204       | 0.763 | 0.314 | 1.420 | 0.182 |

|     |                     |       |       |       |       |
|-----|---------------------|-------|-------|-------|-------|
| 175 | *AC.7269            | 0.668 | 0.251 | 1.243 | 0.191 |
| 176 | AC.10333            | 0.630 | 0.137 | 1.007 | 0.174 |
| 177 | AC.10438            | 0.310 | 0.218 | 0.807 | 0.196 |
| 178 | *AC.10608           | 0.850 | 0.121 | 1.290 | 0.200 |
| 179 | AC.5757             | 0.445 | 0.185 | 1.142 | 0.184 |
| 180 | AC.5768             | 0.352 | 0.214 | 1.365 | 0.175 |
| 181 | AC.5813             | 0.412 | 0.165 | 1.254 | 0.168 |
| 182 | AC.5828             | 0.425 | 0.321 | 1.157 | 0.205 |
| 183 | AC.5832             | 0.456 | 0.221 | 0.987 | 0.165 |
| 184 | AC.5840             | 0.440 | 0.135 | 0.864 | 0.154 |
| 185 | *AC.6183            | 0.540 | 0.193 | 2.143 | 0.227 |
| 186 | AC.5951             | 0.412 | 0.176 | 0.758 | 0.132 |
| 187 | AC.5965             | 0.520 | 0.211 | 0.897 | 0.154 |
| 188 | *AC.6027            | 1.021 | 0.249 | 1.632 | 0.193 |
| 189 | *AC.10162           | 0.925 | 0.087 | 1.996 | 0.196 |
| 190 | AC.6148             | 0.510 | 0.185 | 1.114 | 0.178 |
| 191 | *AC.7282            | 0.986 | 0.083 | 1.225 | 0.189 |
| 192 | AC.6156             | 0.480 | 0.221 | 1.125 | 0.162 |
| 193 | AC.6235             | 0.470 | 0.185 | 0.875 | 0.158 |
| 194 | *AC.6221            | 0.669 | 0.320 | 1.279 | 0.213 |
| 195 | AC.6237             | 0.520 | 0.265 | 0.985 | 0.143 |
| 196 | AC.6562             | 0.450 | 0.145 | 0.985 | 0.189 |
| 197 | AC.6571             | 0.510 | 0.157 | 1.124 | 0.171 |
| 198 | *AC.-5993           | 0.312 | 0.352 | 0.568 | 0.186 |
| 199 | AC.6633             | 0.480 | 0.152 | 1.145 | 0.135 |
| 200 | *AC.7134            | 0.679 | 0.227 | 1.293 | 0.189 |
| 201 | AC.7031             | 0.410 | 0.148 | 1.045 | 0.138 |
| 202 | AC.7041             | 0.470 | 0.176 | 0.984 | 0.149 |
| 203 | *AC.6170            | 0.582 | 0.108 | 1.018 | 0.209 |
| 204 | AC.7073             | 0.480 | 0.138 | 0.853 | 0.162 |
| 205 | *AC.6007            | 0.884 | 0.096 | 1.752 | 0.188 |
| 206 | AC.7089             | 0.510 | 0.149 | 1.237 | 0.178 |
| 207 | AC.7093             | 0.420 | 0.224 | 0.995 | 0.194 |
| 208 | *AC.6172            | 0.448 | 0.272 | 1.035 | 0.219 |
| 209 | AC.7188             | 0.400 | 0.157 | 0.869 | 0.208 |
| 210 | AC. 7135            | 0.450 | 0.142 | 0.794 | 0.114 |
| 211 | AC. 7147            | 0.420 | 0.138 | 0.852 | 0.138 |
| 212 | Polinadhan 2        | 0.626 | 0.159 | 0.816 | 0.218 |
| 213 | Gerwathor           | 0.693 | 0.163 | 1.390 | 0.232 |
| 214 | *Uttarbanga local-9 | 0.112 | 0.169 | 0.321 | 0.243 |
| 215 | Rohidhan-1          | 0.880 | 0.217 | 1.057 | 0.218 |

|     |                 |       |       |       |       |
|-----|-----------------|-------|-------|-------|-------|
| 216 | *Joha           | 0.290 | 0.189 | 0.512 | 0.213 |
| 217 | Manaharrathori  | 0.430 | 0.233 | 0.753 | 0.212 |
| 218 | Ganrohibuna     | 0.580 | 0.183 | 0.723 | 0.250 |
| 219 | Kadamful        | 0.540 | 0.183 | 1.243 | 0.236 |
| 220 | *Jhingesal      | 0.942 | 0.189 | 1.552 | 0.249 |
| 221 | Bakuldhan       | 0.173 | 0.046 | 0.650 | 0.268 |
| 222 | *Gochi          | 0.447 | 0.159 | 0.697 | 0.246 |
| 223 | Kaikee          | 0.727 | 0.241 | 1.140 | 0.250 |
| 224 | *Palina dhan-1  | 0.659 | 0.081 | 0.931 | 0.241 |
| 225 | Bathidhan       | 0.345 | 0.189 | 1.256 | 0.221 |
| 226 | Kauka           | 0.542 | 0.221 | 0.956 | 0.238 |
| 227 | Param nada      | 0.446 | 0.154 | 0.845 | 0.256 |
| 228 | Sitaluchi       | 0.441 | 0.196 | 1.121 | 0.185 |
| 229 | *Shayam         | 0.479 | 0.073 | 1.245 | 0.286 |
| 230 | Kukurjali       | 0.384 | 0.253 | 0.856 | 0.197 |
| 231 | Durudhan        | 0.376 | 0.146 | 0.997 | 0.212 |
| 232 | Khara           | 0.449 | 0.165 | 1.243 | 0.254 |
| 233 | Hetomari        | 0.521 | 0.194 | 0.987 | 0.232 |
| 234 | *Dad ghani      | 0.360 | 0.098 | 0.487 | 0.263 |
| 235 | Khajurchar      | 0.436 | 0.218 | 1.658 | 0.215 |
| 236 | Pawandhan       | 0.385 | 0.225 | 2.145 | 0.249 |
| 237 | Meghjawain      | 0.512 | 0.165 | 1.352 | 0.182 |
| 238 | *Basumati-B     | 0.673 | 0.069 | 0.946 | 0.263 |
| 239 | Bharati         | 0.469 | 0.235 | 1.475 | 0.149 |
| 240 | *Chatuimuchi    | 0.512 | 0.137 | 1.148 | 0.261 |
| 241 | Seshphal        | 0.327 | 0.186 | 1.698 | 0.164 |
| 242 | Kaalibank       | 0.365 | 0.221 | 0.987 | 0.213 |
| 243 | kaloghandeswari | 0.258 | 0.089 | 0.874 | 0.185 |
| 244 | Jaldhapa        | 0.247 | 0.211 | 0.965 | 0.192 |
| 245 | *Jhagrikartik   | 0.327 | 0.104 | 1.257 | 0.226 |
| 246 | Chingrifuli     | 0.312 | 0.205 | 0.771 | 0.164 |
| 247 | Lalkadhan       | 0.249 | 0.185 | 0.845 | 0.208 |
| 248 | *Bharati        | 0.736 | 0.179 | 0.864 | 0.235 |
| 249 | Moriadhan       | 0.225 | 0.198 | 0.961 | 0.149 |
| 250 | Kashiyabinni    | 0.214 | 0.148 | 1.102 | 0.168 |
| 251 | Kotki           | 0.278 | 0.151 | 0.995 | 0.198 |
| 252 | *Sugandha-2     | 0.429 | 0.033 | 0.920 | 0.279 |
| 253 | Domnadhan       | 0.158 | 0.128 | 0.976 | 0.208 |
| 254 | Kauka           | 0.214 | 0.149 | 1.114 | 0.211 |
| 255 | AC. 44585       | 0.750 | 0.064 | 0.611 | 0.333 |
| 256 | AC. 44588       | 1.900 | 0.023 | 0.717 | 0.333 |



|                   |           |        |        |        |       |
|-------------------|-----------|--------|--------|--------|-------|
| 257               | AC. 44591 | 3.100  | 0.025  | 1.144  | 0.333 |
| 258               | AC. 44592 | 1.517  | 0.047  | 0.883  | 0.333 |
| 259               | AC. 44594 | 5.100  | 0.045  | 2.150  | 0.333 |
| 260               | AC. 44595 | 2.283  | 0.023  | 0.856  | 0.333 |
| 261               | AC. 44597 | 3.583  | 0.023  | 1.594  | 0.333 |
| 262               | AC. 44598 | 0.200  | 0.056  | 0.500  | 0.333 |
| 263               | AC. 44638 | 3.433  | 0.030  | 2.006  | 0.333 |
| 264               | AC. 44646 | 2.033  | 0.033  | 1.200  | 0.333 |
| 265               | AC. 44603 | 2.050  | 0.044  | 1.100  | 0.333 |
| 266               | AC. 44604 | 1.717  | 0.037  | 0.622  | 0.333 |
| 267               | AC. 43658 | 4.850  | 0.027  | 2.617  | 0.293 |
| 268               | AC.43660  | 8.983  | 0.101  | 4.450  | 0.310 |
| 269               | AC.43661  | 3.683  | 0.051  | 2.089  | 0.323 |
| 270               | AC.43662  | 4.433  | 0.034  | 2.356  | 0.327 |
| 271               | AC.43663  | 3.467  | 0.032  | 1.556  | 0.301 |
| 272               | AC.43669  | 6.533  | 0.038  | 3.722  | 0.325 |
| 273               | AC.43670  | 2.483  | 0.075  | 1.689  | 0.417 |
| 274               | AC.43675  | 2.517  | 0.050  | 1.633  | 0.293 |
| 275               | AC.43676  | 4.567  | 0.034  | 2.250  | 0.290 |
| 276               | AC.43732  | 4.333  | 0.091  | 2.294  | 0.296 |
| 277               | AC. 43737 | 6.650  | 0.054  | 3.828  | 0.310 |
| 278               | AC. 43738 | 0.067  | 0.047  | 0.756  | 0.286 |
| CV %              |           | 12.342 | 13.121 | 12.053 | 5.351 |
| LSD <sub>5%</sub> |           | 0.207  | 0.034  | 0.295  | 0.095 |

**Supplementary Table S2.** Simple sequence repeat markers used for association mapping of germination rate and early seedling growth parameters in a panel population of 124 rice germplasm lines.

| SL No | PR Name | Ch No | Position (bp) | Forward                   | Reverse                   | Repeat motif     | AT |
|-------|---------|-------|---------------|---------------------------|---------------------------|------------------|----|
| 1     | RM5310  | 1     | 41197253      | TAGACAAAGCAACGGGTTCC      | CGGAAGCAGGAGAATCGTAG      | (TC)12           | 55 |
| 2     | RM582   | 1     | 9190478       | TCTGTTGCCGATTTGTTCG       | AAATGGCTTACCTGCTGTCTC     | (TC)20           | 55 |
| 3     | RM13335 | 2     | 19213952      | TATGCCAAGAGGAATCCTGAAGC   | GCACTCACACTGATCTGGACAGG   | (GT)10           | 55 |
| 4     | RM6275  | 2     | 7273421       | CACTGAGCCCTTTTGTCTC       | TCCCAGATCAGAATCGAAGG      | (CTG)8           | 50 |
| 5     | RM50    | 6     | 6300000       | ACTGTACCGGTCGAAGACG       | AAATTCCACGTCAGCCTCC       | (CTAT)4(CT)15    | 55 |
| 6     | RM85    | 3     | 37200000      | CCAAAGATGAAACCTGGATTG     | GCACAAGGTGAGCAGTCC        | (TGG)5(TCT)12    | 55 |
| 7     | RM222   | 10    | 2600000       | CTTAAATGGGCCACATGCG       | CAAAGCTTCCGGCCAAAAG       | (CT)18           | 55 |
| 8     | RM247   | 12    | 3185384       | TAGTGCCGATCGATGTAACG      | CATATGGTTTTGACAAAGCG      | (CT)16           | 55 |
| 9     | RM328   | 9     | 3,726,000     | CATAGTGGAGTATGCAGCTGC     | CCTTCTCCCAGTCGTATCTG      | (CAT)5           | 55 |
| 10    | RM337   | 8     | 152299        | GTAGGAAAGGAAGGGCAGAG      | CGATAGATAGCTAGATGTGGCC    | (CTT)4-19-(CTT)8 | 55 |
| 11    | RM340   | 6     | 28599181      | GGTAAATGGACAATCCTATGGC    | GACAAATATAAGGGCAGTGTGC    | (CTT)8T3(CTT)14  | 55 |
| 12    | RM470   | 4     | 28,090,431    | TCCTCATCGGCTTCTTCTC       | AGAACCCGTTCTACGTCACG      | (CTT)14          | 55 |
| 13    | RM472   | 1     | 37889084      | CCATGGCCTGAGAGAGAGAG      | AGCTAAATGGCCATACGGTG      | (GA)21           | 55 |
| 14    | RM506   | 8     | 435648-35677  | CGAGCTAACTTCCGTTCTGG      | GCTACTTGGGTAGCTGACCG      | (CT)13           | 55 |
| 15    | RM1812  | 11    | 2405106       | CAGCTAGTGAGCTCCTAGTG      | GCTAACCCACCAACTTATTC      | (AT)16           | 55 |
| 16    | RM3701  | 11    | 8100974       | GAGCTAGAGGGAGGAGGTGC      | TTGACTGATAGCCGATTGGG      | (GA)15           | 55 |
| 17    | RM6947  | 12    | 23974120      | ATTAAACGTCCACTGCTGGC      | GCTAGGTTAGTGGTGCAGGG      | (TTC)8           | 55 |
| 18    | RM14978 | 3     | 13880447      | TATCTGCAGGTGCGTGTAATGG    | GCATATAGAGCGAGTAAGCGAGAGG | (TC)10           | 55 |
| 19    | RM18776 | 5     | 21661718      | CTCCAGGAGGGTACAAATTCTGC   | CCATTGGAACATAGCAAGTGATCG  | (GA)13           | 53 |
| 20    | RM22034 | 7     | 26403619      | CCAGTTTATCTTCTGCACCTTCTCG | TCTTTGAGCAGATGGCTAACAAGG  | (ATTA)5          | 53 |
| 21    | RM24161 | 9     | 12311985      | GTATGGCGAGACCCTACAGACC    | GACCCACTTAATGTGTCACAAGG   | (TATT)5          | 54 |
| 22    | RM223   | 8     | 20650060      | GAGTGAGCTTGGGCTGAAAC      | GAAGGCAAGTCTTGGCACTG      | (CT)25           | 55 |
| 23    | RM440   | 5     | 19912517      | CATGCAACAACGTCACCTTC      | ATGGTTGGTAGGCACCAAAG      | (CTT)22          | 55 |
| 24    | RM201   | 9     | 20174289      | CTCGTTTATTACCTACAGTACC    | CTACCTCCTTTCTAGACCGATA    | (CT)17           | 55 |
| 25    | RM216   | 10    | 5,352,766     | GCATGGCCGATGGTAAAG        | TGTATAAAACCACACGGCCA      | (CT)18           | 55 |
| 26    | RM258   | 10    | 18014265      | TGCTGTATGTAGCTCGCACC      | TGGCCTTTAAAGCTGTGCGC      | (GA)21(GGA)3     | 55 |

|    |                |    |            |                          |                            |                    |    |
|----|----------------|----|------------|--------------------------|----------------------------|--------------------|----|
| 27 | <b>RM286</b>   | 11 | 383711     | GGCTTCATCTTTGGCGAC       | CCGGATTCACGAGATAAACTC      | (GA)16             | 55 |
| 28 | <b>RM3735</b>  | 4  | 26210755   | GCGACCGATCAGCTAGCTAG     | ATAACTCCTCCCTTGCTGCC       | (GA)16             | 55 |
| 29 | <b>RM1347</b>  | 2  | 5314190    | AACAAATTAAGTCCAAAG       | GTCTTATCATCAGAACTGGA       | (AG)23             | 55 |
| 30 | <b>RM7571</b>  | 7  | 10369821   | CCTTATGCCCCCTTCTTAC      | TCGTCTCATGGAGCCACC         | (TCTA)6            | 61 |
| 31 | <b>RM14723</b> | 3  | 9,223,269  | GCAAAGTCCTTTGGACAGGTAGC  | CGTCCCAGATCAAAGTACACTCTTCC | (GA)29             | 54 |
| 32 | <b>RM103</b>   | 6  | 30889151   | CTTCCAATTCAGGCCGGCTGGC   | CGCCACAGCTGACCATGCATGC     | (GAA)5             | 55 |
| 33 | <b>RM315</b>   | 1  | 36734135   | GAGGTACTTCTCCGTTTCAC     | AGTCAGCTCACTGTGCAGTG       | (AT)4(GT)10        | 55 |
| 34 | <b>RM225</b>   | 6  | 3416533    | TGCCCATATGGTCTGGATG      | GAAAGTGGATCAGGAAGGC        | (CT)18             | 55 |
| 35 | <b>RM486</b>   | 1  | 34955554   | CCCCCTCTCTCTCTCTC        | TAGCCACATCAACAGCTTGC       | (CT)14             | 55 |
| 36 | <b>RM256</b>   | 8  | 24270635   | GACAGGGAGTGATTGAAGGC     | GTTGATTTGCGCAAGGGC         | (CT)21             | 55 |
| 37 | <b>RM1113</b>  | 4  | 34085697   | GGGCGCATGTGTATTTCTTC     | TGGGGAAAAACCACAAGCC        | (AG)12             | 55 |
| 38 | <b>RM3423</b>  | 4  | 30,957,747 | AGCAGGCATATAAAGGTGCC     | TGGCCTCAGATTCAGGAAAC       | (CT)18             | 50 |
| 39 | <b>RM6100</b>  | 10 | 18,816,637 | TCCTCTACCAGTACCGCACC     | GCTGGATCACAGATCATTGC       | (CGA)8             | 50 |
| 40 | <b>RM590</b>   | 10 | 23043156   | CATCTCCGCTCTCCATGC       | GGAGTTGGGGTCTTGTTTCG       | (TCT)10            | 55 |
| 41 | <b>RM5793</b>  | 7  | 17489638   | ACTCTCTGCGCAACTCTC       | GATAATGCTAGCTGTGGCC        |                    | 50 |
| 42 | <b>RM405</b>   | 5  | 3073406    | TCACACACTGACAGTCTGAC     | AATGTGGCACGTGAGGTAAG       | (AC)14             | 55 |
| 43 | <b>RM547</b>   | 8  | 5591403    | TAGGTTGGCAGACCTTTTCG     | GTCAAGATCATCCTCGTAGCG      | (ATT)19            | 55 |
| 44 | <b>RM7364</b>  | 9  | 9561213    | TTCGTGGATGGAGGGAGTAC     | AGCGTTTGTAGGAGTGCCAC       | (CTAT)9            | 50 |
| 45 | <b>RM205</b>   | 9  | 22720624   | CTGGTTCTGTATGGGAGCAG     | CTGGCCCTTCACGTTTCAGTG      | (CT)25             | 55 |
| 46 | <b>RM167</b>   | 11 | 4073024    | GATCCAGCGTGAGGAACACGT    | AGTCCGACCACAAGGTGCGTTGTC   | (GA)16             | 53 |
| 47 | <b>RM229</b>   | 11 | 18,407,879 | CACTCACACGAACGACTGAC     | CGCAGGTTCTTGTAATGT         | (TC)11(CT)5C3(CT)5 | 50 |
| 48 | <b>RM20A</b>   | 12 | 970538     | ATCTTGTCCTGCAGGTCAT      | GAAACAGAGGCACATTTTCATTG    | (ATT)14            | 55 |
| 49 | <b>RM235</b>   | 12 | 26107904   | AGAAGCTAGGGCTAACGAAC     | TCACCTGGTCAGCCTCTTTC       | (CT)24             | 55 |
| 50 | <b>RM7003</b>  | 12 | 6775083    | GGCAGACATACAGCTTATAGGC   | TGCAATGAACCCCTCTAGC        | (AAAC)6            | 50 |
| 51 | <b>RM5436</b>  | 7  | 9074712    | CAAAGGGGGTGTCTCTATG      | GTTGCTCGTCTACATGTGC        |                    | 50 |
| 52 | <b>RM25181</b> | 10 | 8849270    | AAAGAGCTTCCCTAATGGCTTCG  | GAGAGAATGACCTCTCCAAGACC    | (TTC)22            | 55 |
| 53 | <b>RM469</b>   | 6  | 564,135    | AGCTGAACAAGCCCTGAAAG     | GACTTGGGCAGTGTGACATG       | (AG)15             | 55 |
| 54 | <b>RM6547</b>  | 1  | 34693224   | TCCATCCTTCTCTCTCGTG      | AGCCACCCCATATATAGCC        | (GCT)9             | 50 |
| 55 | <b>RM152</b>   | 8  | 682963     | GAAACCACCACCTCACCG       | CCGTAGACCTTCTGAAGTAG       | (GGC)10            | 55 |
| 56 | <b>RM148</b>   | 3  | 35835805   | ATACAACATTAGGGATGAGGCTGG | TCCTTAAAGGTGGTGAATGCGAG    | (TG)12             | 50 |

|    |                |    |            |                          |                         |                     |    |
|----|----------------|----|------------|--------------------------|-------------------------|---------------------|----|
| 57 | <b>RM421</b>   | 5  | 23976333   | AGCTCAGGTGAAACATCCAC     | ATCCAGAATCCATTGACCCC    | (AGAT)6             | 55 |
| 58 | <b>RM2634</b>  | 2  | 20495111   | GATTGAAAATTAGAGTTTGCAC   | TGCCGAGATTTAGTCAACTA    | (AT)31              | 55 |
| 59 | <b>RM248</b>   | 7  | 29,339,845 | TCCTTGTGAAATCTGGTCCC     | GTAGCCTAGCATGGTGCATG    | (CT)25              | 55 |
| 60 | <b>RM7179</b>  | 6  | 19728535   | CACGTGTCAGCTTAAGAGCG     | TTACATCATAAGCCCGCAGG    | (ATAG)6             | 50 |
| 61 | <b>RM215</b>   | 9  | 21189110   | CAAAATGGAGCAGCAAGAGC     | TGAGCACCTCCTTCTCTGTAG   | (CT)16              | 55 |
| 62 | <b>RM324</b>   | 2  | 11389704   | CTGATTCCACACACTTGTGC     | GATTCCACGTCAGGATCTTC    | (CAT)21             | 55 |
| 63 | <b>RM317</b>   | 4  | 29060978   | CATACTTACCAGTTCACCGCC    | CTGGAGAGTGTGAGCTAGTTGA  | (GC)4(GT)18         | 55 |
| 64 | <b>RM174</b>   | 2  | 7006085    | AGCGACGCCAAGACAAGTCGGG   | TCCACGTCGATCGACACGACGG  | (AGG)7(GA)10        | 67 |
| 65 | <b>RM556</b>   | 8  | 22339816   | ACTCCAAACCTCACTGCACC     | TAGCACACTGAACAGCTGGC    | (CCAG)6             | 55 |
| 66 | <b>RM257</b>   | 9  | 17719660   | CAGTTCGAGCAAGAGTACTC     | GGATCGGACGTGGCATATG     | (CT)24              | 55 |
| 67 | <b>RM502</b>   | 8  | 26492117   | GCGATCGATGGCTACGAC       | ACAACCCAACAAGAAGGACG    | (TG)10              | 55 |
| 68 | <b>RM331</b>   | 8  | 12294124   | GAACCAGAGGACAAAAATGC     | CATCATACATTTCAGCCAG     | [(CTT)4GTT]2(CTT)11 | 55 |
| 69 | <b>RM403</b>   | 1  | 29384585   | GCTGTGCATGCAAGTTCATG     | ATGGTCCTCATGTTTCATGGC   | (GA)8               | 55 |
| 70 | <b>RM309</b>   | 12 | 21454591   | GTAGATCACGCACCTTTCTGG    | AGAAGGCCCTCCGGTGAAG     | (GT)13              | 55 |
| 71 | <b>RM6641</b>  | 2  | 4633966    | GGGTCTCGATTCTCAGTTGG     | CAGAACCACTCATGCACACC    | (GTA)14             | 55 |
| 72 | <b>RM3</b>     | 6  | 19499320   | AACTGTAGCGGCCACTG        | CCTCCACTGCTCCACATCTT    | (GA)2GG(GA)25       | 55 |
| 73 | <b>RM594</b>   | 1  | 15158295   | GCCACCAGTAAAAGCAATAC     | TTGATCTGCTAGTGAGACCC    | (GA)n               | 55 |
| 74 | <b>RM3392</b>  | 3  | 3825907    | GTCCAATGATTCGTTCCAC      | CTTCACCGTTCACCAATTCC    | (CT)17              | 55 |
| 75 | <b>RM1278</b>  | 3  | 4561347    | ATATAAAGGTGGCACGACAG     | GCACTTGAACCTAATTCTCC    | (AG)17              | 55 |
| 76 | <b>RM168</b>   | 3  | 28091534   | TGCTGCTTGCCTGCTTCCTT     | GAAACGAATCAATCCACGGC    | T15(GT)14           | 50 |
| 77 | <b>RM3375</b>  | 1  | 18729953   | TTGACCTCCTCCTCCACAAC     | TTGCAAGGAACTAGGAGGG     | (CT)16              | 55 |
| 78 | <b>RM282</b>   | 3  | 12407382   | CTGTGTGCAAAGGCTGCAC      | CAGTCCTGTGTTGCAGCAAG    | (GA)15              | 55 |
| 79 | <b>RM26632</b> | 11 | 14702841   | CCAATCACAACCCTCCATCACC   | CCAAAGAGCAACATTGGTTGTGC | (TCTT)9             | 50 |
| 80 | <b>RM1341</b>  | 11 | 19677083   | AACCTGGAGGTGCTGGTCTC     | TTTCTCCCCCAACCAC        |                     | 50 |
| 81 | <b>RM4112</b>  | 11 | 24646850   | TGGCAAAGTCAGTAGCTTCCACAA | GCCATTCCTCCCAACAGCTCC   | (TA)14              | 55 |
| 82 | <b>RM20377</b> | 6  | 24,320,992 | GTGTGTGATGTGCATGTTTCTGC  | CATGTGATGCCCTGTAGGAACC  | (CT)33              | 50 |
| 83 | <b>RM210</b>   | 8  | 22471837   | TCACATTCGGTGGCATTG       | CGAGGATGGTTGTTCACTTG    | (CT)23              | 55 |
| 84 | <b>RM218</b>   | 3  | 8405368    | TGGTCAAACCAAGGTCCTTC     | GACATACATTCTACCCCGG     | (TC)24ACT5(GT)11    | 55 |
| 85 | <b>RM494</b>   | 6  | 31088146   | GGGAGGGGATCGAGATAGAC     | TTTAACCTTCCTTCCGCTCC    | (AGA)16             | 55 |
| 86 | <b>RM336</b>   | 7  | 21,871,205 | CTTACAGAGAAACGGCATCG     | GCTGGTTTGTTCAGGTTCCG    | (CTT)18             | 55 |

|     |                |    |                |                           |                          |             |    |
|-----|----------------|----|----------------|---------------------------|--------------------------|-------------|----|
| 87  | <b>RM3475</b>  | 1  | 26041024       | GTCGGTTTGCCTAGTTGAGC      | TTCCTCGGTGTATGGGTCTC     | (CT)22      | 55 |
| 88  | <b>RM480</b>   | 5  | 27,313,250     | GCTCAAGCATTCTGCAGTTG      | GCGCTTCTGCTTATTGGAAG     | (AC)30      | 55 |
| 89  | <b>RM566</b>   | 8  | 14704764       | ACCCAACACGATCAGCTCG       | CTCCAGGAACACGCTCTTTC     | (CCAG)6     | 55 |
| 90  | <b>RM11701</b> | 1  | 32026621       | CTGGTGGAGTTGCAGTGCCTCTAGC | CCTTGCTGCTTCTCATTGAACTGG | (CT)18      | 56 |
| 91  | <b>RM220</b>   | 1  | 4424392        | GGAAGGTAAGTGTTC AAC       | GAAATGCTTCCCACATGTCT     | (CT)17      | 55 |
| 92  | <b>RM488</b>   | 1  | 24807508       | CAGCTAGGGTTTTGAGGCTG      | TAGCAACAACCAGCGTATGC     | (GA)17      | 55 |
| 93  | <b>RM6374</b>  | 2  | 15181966       | TGAGGACGCTGATTGTCAAC      | GCTGCCCTATTATTTACC       | (GAA)16     | 55 |
| 94  | <b>RM233</b>   | 2  | 2069848        | CCAAATGAACCTACATGTTG      | GCATTGCAGACAGCTATTGA     | (CT)20      | 55 |
| 95  | <b>RM112</b>   | 2  | 32013785       | GGGAGGAGAGGCAAGCGGAGAG    | AGCCGGTGCA GTGGACGGTGAC  | (GAA)5      | 55 |
| 96  | <b>RM13600</b> | 2  | 24246249       | GGTTAACCTTTCTCGCTCTTTGG   | ATGATCCAAACCCACTGTCTTCC  | (AG)11      | 50 |
| 97  | <b>RM495</b>   | 1  | 215956         | AATCCAAGGTGCAGAGATGG      | CAACGATGACGAACACAACC     | (CTG)7      | 55 |
| 98  | <b>RM493</b>   | 1  | 12280117       | TAGCTCCAACAGGATCGACC      | GTACGTAAACGCGGAAGGTG     | (CTT)9      | 55 |
| 99  | <b>RM444</b>   | 9  | 5925016        | GCTCCACCTGCTTAAGCATC      | TGAAGACCATGTTCTGCAGG     | (AT)12      | 55 |
| 100 | <b>RM468</b>   | 3  | 32674852       | CCCTTCCTTGTTGTGGCTAC      | TGATTTCTGAGAGCCAACCC     | (TAT)8      | 55 |
| 101 | <b>RM6054</b>  | 5  | 22779263       | CCCTCCGTACGGATACACAC      | CTCTTCGGCTTCATCTCCTC     | (CCG)12     | 55 |
| 102 | <b>RM509</b>   | 5  | 16324561       | TAGTGAGGGAGTGGAACGG       | ATCGTCCCCACAATCTCATC     | (TC)11      | 55 |
| 103 | <b>RM5638</b>  | 1  | 20934810       | GGCTTCCTCATCGCCATC        | CTGAGCAGCATTCCAGTCTG     | (AAG)13     | 55 |
| 104 | <b>RM8044</b>  | 7  | 24,195,172     | AGTACTTGCTCTCTTAGCAG      | CAATATTCACTCAACTCTCA     | (CTT)18     | 55 |
| 105 | <b>RM8271</b>  | 8  | 7616956-617315 | TCTTGAGAAATCTGCCATTC      | ACTGATGTGCATTTCGTC       | (AG)32      | 55 |
| 106 | <b>RM171</b>   | 10 | 19048795       | AACGCGAGGACACGTACTTAC     | ACGAGATACGTACGCCTTTG     | (GATG)5     | 55 |
| 107 | <b>RM16686</b> | 4  | 14718643       | GGCACTGCTTGCATATGGATCG    | TGCCGGCGAACTTATCCTCTCC   | (GGA)10     | 53 |
| 108 | <b>RM434</b>   | 9  | 15662573       | GCCTCATCCCTCTAACCTC       | CAAGAAAGATCAGTGC GTGG    | (TC)12      | 55 |
| 109 | <b>RM6091</b>  | 11 | 13405326       | GCTGTCTGTCTTGAATCC        | TGGTAGGCTGGTGACATGC      | (CCT)11     | 50 |
| 110 | <b>RM209</b>   | 11 | 17808335       | ATATGAGTTGCTGTCGTGCG      | CAACTTGCATCCTCCCCTCC     | (CT)18      | 55 |
| 111 | <b>RM245</b>   | 9  | 22300000       | ATGCCGCCAGTGAATAGC        | CTGAGAATCCAATTATCTGGGG   | (CT)14      | 55 |
| 112 | <b>RM1089</b>  | 5  | 5356127        | CAGAAGGATTATCTCGATACC     | AATAGGGCTTGAAATAAATTG    | (AC)33      | 55 |
| 113 | <b>RM228</b>   | 10 | 22243157       | CTGGCCATTAGTCCTTGG        | GCTTGCGGCTCTGCTTAC       | (CA)6(GA)36 | 55 |
| 114 | <b>RM401</b>   | 4  | 13154172       | TGGAACAGATAGGGTGTAAGGG    | CCGTTCAACAACATATAAAGC    | (CT)15      | 55 |
| 115 | <b>RM11</b>    | 7  | 19256914       | TCTCTCTTCCCCCGATC         | ATAGCGGGCGAGGCTTAG       | (GA)17      | 55 |
| 116 | <b>RM3351</b>  | 5  | 20696671       | ATGGAAGGAATGGAGGTGAG      | TACCCCTACGTCGATCGATC     | (CT)15      | 55 |

|     |                |    |                   |                            |                              |                 |    |
|-----|----------------|----|-------------------|----------------------------|------------------------------|-----------------|----|
| 117 | <b>RM5749</b>  | 4  | 19950587          | GTGACCACATCTATATCGCTCG     | ATGGCAAGGTTGGATCAGTC         | (ACT)8          | 55 |
| 118 | <b>RM335</b>   | 4  | 688353            | GTACACACCCACATCGAGAAG      | GCTCTATGCGAGTATCCATGG        | (CTT)25         | 55 |
| 119 | <b>RM144</b>   | 11 | 28281693          | TGCCCTGGCGCAAATTTGATCC     | GCTAGAGGAGATCAGATGGTAGTGCATG | (ATT)11         | 55 |
| 120 | <b>RM300</b>   | 2  | 13191380          | GCTTAAGGACTTCTGCGAACC      | CAACAGCGATCCACATCATC         | (GTT)14         | 55 |
| 121 | <b>RM1132</b>  | 7  | 23984489          | ATCACCTGAGAAACATCCGG       | CTCCTCCCACGTCAAGGTC          | (AG)12          | 55 |
| 122 | <b>RM400</b>   | 6  | 28431560          | ACACCAGGCTACCCAAACTC       | CGGAGAGATCTGACATGTGG         | (ATA)63         | 55 |
| 123 | <b>RM471</b>   | 4  | 18824746          | ACGCACAAGCAGATGATGAG       | GGGAGAAGACGAATGTTTGC         | (GA)12          | 55 |
| 124 | <b>RM243</b>   | 1  | 7970722           | GATCTGCAGACTGCAGTTGC       | AGCTGCAACGATGTTGTCC          | (CT)18          | 55 |
| 125 | <b>RM467</b>   | 10 | 13488471          | GGTCTCTCTCTCTCTCTCTCTC     | CTCCTGACAATTCAACTGCG         | (TC)21          | 55 |
| 126 | <b>RM564</b>   | 3  | 18587434          | CATGGCCTTGTGTATGCATC       | ATGCAGAGGATTGGCTTGAG         | (GT)14          | 55 |
| 127 | <b>RM8007</b>  | 7  | 7710329           | AATAGGATGGATCATGGATA       | CATCTCATCAGGAACCTAAC         | (AT)40          | 55 |
| 128 | <b>RM441</b>   | 11 | 6081100           | ACACCAGAGAGAGAGAGAGAGAG    | TCTGCAACGGCTGATAGATG         | (AG)13          | 55 |
| 129 | <b>RM518</b>   | 4  | 2030135           | CTCTTCACTCACTCACCATGG      | ATCCATCTGGAGCAAGCAAC         | (TC)15          | 55 |
| 130 | <b>RM253</b>   | 6  | 5425408           | TCCTTCAAGAGTGCAAACC        | GCATTGTCATGTCGAAGCC          | (GA)25          | 55 |
| 131 | <b>RM274</b>   | 5  | 26848154          | CCTCGCTTATGAGAGCTTCG       | CTTCTCCATCACTCCCATGG         | (GA)15-7-(CGG)5 | 55 |
| 132 | <b>RM242</b>   | 9  | 18810067          | GGCCAACGTGTGTATGTCTC       | TATATGCCAAGACGGATGGG         | (CT)26          | 55 |
| 133 | <b>RM3231</b>  | 8  | 3838134           | AACACGAAGACCGGCCTC         | CAGGTAGGAGCATGAGAGCC         | (CT)12          | 55 |
| 134 | <b>RM5687</b>  | 4  | 15742285          | GATCGCTGGCGATTGATC         | GACTTGTGGGGTGGTTTTTG         | (AAT)17         | 50 |
| 135 | <b>RM5626</b>  | 3  | 24864350          | GCAGACGAGATGAGATCG         | GTAGAGGATGGGCAGCAG           | (AAG)11         | 55 |
| 136 | <b>RM452</b>   | 2  | 9563257           | CTGATCGAGAGCGTTAAGGG       | GGGATCAAACCACGTTTCTG         | (GTC)9          | 55 |
| 137 | <b>RM14960</b> | 3  | 13282361-13282553 | GTCAAGACCACCGCTGGTTCC      | CGACGAGGAGGTTATGGGTCTGG      | (CGA)7          |    |
| 138 | <b>RM558</b>   | 11 | 1608847-1609092   | GAACCTCTCGAACTCGATGC       | AGGCATTCAACCTGTTTCGAC        | (ATTG)5         | 55 |
| 139 | <b>RM406</b>   | 2  | 35236078-35236220 | GAGGGAGAAAGGTGGACATG       | TGTGCTCCTGGGAAGAAAAG         | (GA)17          | 55 |
| 140 | <b>RM522</b>   | 1  | 5244852-5244994   | ACCAGAGAAGCCCTCCTAGC       | GTTCTGTGGTGGTCACGTTG         | (AAT)6          | 55 |
| 141 | <b>RM10124</b> | 1  | 2309722-2310063   | AGATCAGCATGGGTACATTCACTAGG | AATCAGCAGTGTTAGATGCCAAGG     | (AATA)5         |    |
| 142 | <b>RM181</b>   | 11 | 201993-202275     | ACGGGAGCTTCTCCGACAGCGC     | TATGCTTTTGCCGTGTGCCGCG       | (CT)13(AT)19    | 67 |
| 143 | <b>RM175</b>   | 3  | 3865706-3865940   | CTTCGGCGCCGTCATCAAGGTG     | CGTTGAGCAGCGCGACGTTGAC       | (CCG)8          | 67 |

**Supplementary Table S3.** Significant marker-trait associations detected for germination rate and early seedling growth parameters by GLM approach at  $p < 0.01$  using 143 SSR markers.

| Sl.No. | Trait | Marker | Chr     | Position | marker_F | marker_p | marker_Rsq |
|--------|-------|--------|---------|----------|----------|----------|------------|
| 1      | RSG   | B-3    | Unknown | 5        | 9.28475  | 0.00284  | 0.03466    |
| 2      | RSG   | J-1    | Unknown | 27       | 27.20863 | 7.73E-07 | 0.0892     |
| 3      | RSG   | J-4    | Unknown | 30       | 7.41018  | 0.00745  | 0.02807    |
| 4      | RSG   | T-2    | Unknown | 56       | 15.24579 | 1.56E-04 | 0.05441    |
| 5      | RSG   | AG-1   | Unknown | 91       | 10.25151 | 0.00175  | 0.03799    |
| 6      | RSG   | AG-2   | Unknown | 92       | 7.22102  | 0.00823  | 0.02739    |
| 7      | RSG   | AP-1   | Unknown | 109      | 8.17726  | 0.005    | 0.03079    |
| 8      | RSG   | BH-1   | Unknown | 159      | 10.51694 | 0.00153  | 0.03889    |
| 9      | RSG   | CG-1   | Unknown | 221      | 14.93372 | 1.81E-04 | 0.05341    |
| 10     | RSG   | CI-3   | Unknown | 230      | 9.11     | 0.00311  | 0.03405    |
| 11     | RSG   | CU-3   | Unknown | 274      | 8.39526  | 0.00447  | 0.03156    |
| 12     | RSG   | CX-2   | Unknown | 282      | 9.68953  | 0.00232  | 0.03606    |
| 13     | RSG   | DC-1   | Unknown | 300      | 10.79068 | 0.00134  | 0.03982    |
| 14     | RSG   | EC-3   | Unknown | 366      | 14.30325 | 2.44E-04 | 0.0514     |
| 15     | RSG   | EL-1   | Unknown | 384      | 11.65777 | 8.73E-04 | 0.04273    |
| 16     | RSG   | EL-2   | Unknown | 385      | 8.54084  | 0.00415  | 0.03207    |
| 17     | RGR   | O-1    | Unknown | 44       | 10.65642 | 0.00143  | 0.05988    |
| 18     | RGR   | BD-1   | Unknown | 150      | 7.4275   | 0.00738  | 0.04279    |
| 19     | RGR   | CQ-1   | Unknown | 258      | 8.27259  | 0.00476  | 0.04735    |
| 20     | RGR   | CQ-2   | Unknown | 259      | 7.94408  | 0.00564  | 0.04559    |
| 21     | RGR   | CV-1   | Unknown | 276      | 9.36851  | 0.00272  | 0.05317    |
| 22     | RGR   | DM-1   | Unknown | 326      | 8.74447  | 0.00374  | 0.04987    |
| 23     | RGR   | DS-1   | Unknown | 340      | 7.02293  | 0.00913  | 0.04059    |
| 24     | RGR   | EK-1   | Unknown | 382      | 9.85569  | 0.00213  | 0.05572    |
| 25     | AGR   | B-3    | Unknown | 5        | 7.02842  | 0.00911  | 0.05096    |
| 26     | AGR   | G-1    | Unknown | 18       | 10.46761 | 0.00157  | 0.07389    |
| 27     | AGR   | J-1    | Unknown | 27       | 16.07491 | 1.06E-04 | 0.1088     |
| 28     | AGR   | T-2    | Unknown | 56       | 8.60253  | 0.00402  | 0.06161    |
| 29     | AGR   | AC-1   | Unknown | 82       | 9.1193   | 0.00309  | 0.06505    |
| 30     | AGR   | BH-1   | Unknown | 159      | 10.79532 | 0.00133  | 0.07601    |
| 31     | AGR   | CG-1   | Unknown | 221      | 7.88757  | 0.00581  | 0.0568     |
| 32     | AGR   | CG-2   | Unknown | 222      | 11.25419 | 0.00106  | 0.07897    |
| 33     | AGR   | CH-1   | Unknown | 225      | 8.39513  | 0.00447  | 0.06022    |
| 34     | AGR   | CY-4   | Unknown | 286      | 6.90968  | 0.00969  | 0.05014    |
| 35     | AGR   | DC-1   | Unknown | 300      | 10.75337 | 0.00136  | 0.07574    |
| 36     | MGR   | C-1    | Unknown | 6        | 6.90342  | 0.00973  | 0.02679    |
| 37     | MGR   | C-2    | Unknown | 7        | 7.19427  | 0.00834  | 0.02786    |
| 38     | MGR   | F-3    | Unknown | 17       | 12.47855 | 5.85E-04 | 0.04639    |

|    |     |      |         |     |          |          |         |
|----|-----|------|---------|-----|----------|----------|---------|
| 39 | MGR | I-2  | Unknown | 26  | 13.82533 | 3.06E-04 | 0.05088 |
| 40 | MGR | X-1  | Unknown | 68  | 8.46517  | 0.00432  | 0.03245 |
| 41 | MGR | X-2  | Unknown | 69  | 15.24724 | 1.56E-04 | 0.05552 |
| 42 | MGR | Z-1  | Unknown | 73  | 9.92712  | 0.00206  | 0.03763 |
| 43 | MGR | AB-3 | Unknown | 80  | 31.13489 | 1.52E-07 | 0.10146 |
| 44 | MGR | AB-4 | Unknown | 81  | 18.97614 | 2.81E-05 | 0.06725 |
| 45 | MGR | AS-2 | Unknown | 120 | 9.58873  | 0.00244  | 0.03644 |
| 46 | MGR | AY-1 | Unknown | 136 | 7.86476  | 0.00588  | 0.03029 |
| 47 | MGR | BK-1 | Unknown | 168 | 14.34719 | 2.39E-04 | 0.05259 |
| 48 | MGR | BK-2 | Unknown | 169 | 10.76402 | 0.00136  | 0.04054 |
| 49 | MGR | BO-2 | Unknown | 178 | 12.27585 | 6.46E-04 | 0.04571 |
| 50 | MGR | CC-1 | Unknown | 209 | 9.63976  | 0.00238  | 0.03662 |
| 51 | MGR | CM-3 | Unknown | 241 | 11.59527 | 9.00E-04 | 0.0434  |
| 52 | MGR | CN-5 | Unknown | 248 | 7.108    | 0.00873  | 0.02754 |
| 53 | MGR | CO-3 | Unknown | 251 | 15.87512 | 1.17E-04 | 0.05754 |
| 54 | MGR | CO-4 | Unknown | 252 | 8.89955  | 0.00346  | 0.034   |
| 55 | MGR | CP-4 | Unknown | 257 | 9.2386   | 0.00291  | 0.03521 |
| 56 | MGR | DC-1 | Unknown | 300 | 8.48844  | 0.00426  | 0.03254 |
| 57 | MGR | DI-2 | Unknown | 318 | 7.22993  | 0.00819  | 0.02799 |
| 58 | MGR | DP-2 | Unknown | 333 | 7.70705  | 0.00638  | 0.02972 |

**Supplementary Table S4.** Significant marker-trait associations detected for germination rate and early seedling growth parameters by MLM approach at  $p < 0.01$  using 143 SSR markers.

| Trait | Marker | Chr     | Pos | F        | p        | MarkerR2 |
|-------|--------|---------|-----|----------|----------|----------|
| RSG   | B-3    | Unknown | 5   | 8.34334  | 0.00459  | 0.05847  |
| RSG   | J-1    | Unknown | 27  | 16.54241 | 8.55E-05 | 0.11592  |
| RSG   | J-4    | Unknown | 30  | 9.81468  | 0.00218  | 0.06878  |
| RSG   | T-2    | Unknown | 56  | 7.72005  | 0.00634  | 0.0541   |
| RSG   | AG-1   | Unknown | 91  | 8.83099  | 0.00358  | 0.06188  |
| RSG   | AT-3   | Unknown | 123 | 10.32616 | 0.00168  | 0.07236  |
| RSG   | BH-1   | Unknown | 159 | 7.1075   | 0.00873  | 0.04981  |
| RSG   | CG-1   | Unknown | 221 | 14.91786 | 1.83E-04 | 0.10454  |
| RSG   | DC-1   | Unknown | 300 | 8.64751  | 0.00393  | 0.0606   |
| RSG   | EL-1   | Unknown | 384 | 9.98819  | 0.00199  | 0.06999  |
| RGR   | O-1    | Unknown | 44  | 9.21126  | 0.00295  | 0.07091  |
| RGR   | BD-1   | Unknown | 150 | 7.12592  | 0.00865  | 0.05486  |
| RGR   | EK-1   | Unknown | 382 | 8.97394  | 0.00333  | 0.06909  |
| AGR   | J-1    | Unknown | 27  | 9.56844  | 0.00246  | 0.07805  |
| AGR   | Q-2    | Unknown | 50  | 7.03617  | 0.00907  | 0.0574   |
| AGR   | BH-1   | Unknown | 159 | 10.27457 | 0.00173  | 0.08381  |



|     |      |         |     |          |          |         |
|-----|------|---------|-----|----------|----------|---------|
| AGR | CG-1 | Unknown | 221 | 9.96554  | 0.00202  | 0.08129 |
| AGR | CG-2 | Unknown | 222 | 7.76612  | 0.00619  | 0.06335 |
| AGR | DC-1 | Unknown | 300 | 11.68419 | 8.62E-04 | 0.09531 |
| MGR | AB-3 | Unknown | 80  | 15.01011 | 1.75E-04 | 0.1052  |
| MGR | AB-4 | Unknown | 81  | 13.40634 | 3.74E-04 | 0.09396 |
| MGR | AT-2 | Unknown | 122 | 7.87321  | 0.00586  | 0.05518 |
| MGR | CM-3 | Unknown | 241 | 8.75915  | 0.00371  | 0.06139 |
| MGR | CY-5 | Unknown | 287 | 11.2439  | 0.00107  | 0.0788  |
| MGR | DC-1 | Unknown | 300 | 6.94926  | 0.00949  | 0.04871 |
